# Supplementary material for: Validation and Demonstration of an Atmosphere-Temperature-pH-Controlled Stirred Batch Reactor System for Determination of (Nano)Material Solubility and Dissolution Kinetics in Physiological Simulant Lung Fluids
Source: MDPI journal article supplement (doi:10.3390/nano12030517), 2022-02-02
Supplement: s1 [file s1]

---

## Supplementary Materials

# Validation and Demonstration of an Atmosphere-Temperature-pH-Controlled Stirred Batch Reactor System for Determination of (Nano)Material Solubility and Dissolution Kinetics in Physiological Simulant Lung Fluids

Else Holmfred <sup>1,2,\*</sup>, Katrin Loeschner <sup>2</sup>, Jens J. Sloth <sup>2</sup> and Keld Alstrup Jensen <sup>1,\*</sup>

<sup>1</sup> National Research Centre for the Working Environment, 2100 Copenhagen, Denmark

<sup>2</sup> Research Group for Analytical Food Chemistry, Division of Food Technology, National Food Institute, Technical University of Denmark, 2800 Kgs. Lyngby, Denmark; kals@food.dtu.dk (K.L.); jjsl@food.dtu.dk (J.J.S.)

\* Correspondence: elshol@food.dtu.dk (E.H.); kaj@nfa.dk (K.A.J.)

**Table S1.** ICP-MS parameters used during the analysis of dissolved ions and limit of detection in phagolysosomal fluid simulant.

| Parameter [unit]                          | Al <sub>2</sub> O <sub>3</sub> | TiO <sub>2</sub><br>(NM-104)       | ZnO<br>(NM-110, 111, 113) | SiO <sub>2</sub><br>(NM-200) | CeO <sub>2</sub><br>(NM-212) | Bentonite<br>(NM-600)              |
|-------------------------------------------|--------------------------------|------------------------------------|---------------------------|------------------------------|------------------------------|------------------------------------|
| Nebulizer gas flow rate [mL/min]          | 1.01                           | 1.05                               | 1.03                      | 1.04                         | 1.03                         | 1.05                               |
| Helium cell gas flow rate [mL/min]        | 4.55                           | 4.35                               | 4.35                      | 4.43                         | n/a                          | 4.29                               |
| Monitored isotopes [m/z]                  | <sup>27</sup> Al               | <sup>27</sup> Al, <sup>48</sup> Ti | <sup>66</sup> Zn          | <sup>28</sup> Si             | <sup>140</sup> Ce            | <sup>27</sup> Al, <sup>28</sup> Si |
| Internal standard [m/z]                   | <sup>103</sup> Rh              | <sup>103</sup> Rh                  | <sup>103</sup> Rh         | <sup>89</sup> Y              | <sup>103</sup> Rh            | <sup>103</sup> Rh                  |
| Limit of detection of the measured ion(s) | 12 µg/L                        | Al: 5.2 µg/L<br>Ti: 8.6 µg/L       | 70 µg/L                   | 271 µg/L                     | 0.03 µg/L                    | Al: 4.1 µg/L Si: 17 µg/L           |
| Dilution factor for ICP-MS analysis       | x10                            | x10                                | x1000                     | x100                         | x4                           | x10                                |

**Table S2.** ICP-MS parameters used during the analysis of dissolved ions and limit of detection in low-calcium Gamble's solution.

| Parameter [unit]                          | Al <sub>2</sub> O <sub>3</sub> | TiO <sub>2</sub><br>(NM-104)       | ZnO<br>(NM-110, 111, 113) | SiO <sub>2</sub><br>(NM-200) | CeO <sub>2</sub><br>(NM-212) | Bentonite<br>(NM-600)              |
|-------------------------------------------|--------------------------------|------------------------------------|---------------------------|------------------------------|------------------------------|------------------------------------|
| Nebulizer gas flow rate [mL/min]          | 1.01                           | 1.02                               | 1.00                      | 1.02                         | 1.02                         | 1.02                               |
| Helium cell gas flow rate [mL/min]        | 4.50                           | n/a, 4.50                          | n/a                       | 4.50                         | n/a                          | 4.59                               |
| Monitored isotopes [m/z]                  | <sup>27</sup> Al               | <sup>27</sup> Al, <sup>49</sup> Ti | <sup>66</sup> Zn          | <sup>28</sup> Si             | <sup>140</sup> Ce            | <sup>27</sup> Al, <sup>28</sup> Si |
| Internal standard [m/z]                   | <sup>103</sup> Rh              | <sup>89</sup> Y                    | <sup>103</sup> Rh         | <sup>75</sup> As             | <sup>103</sup> Rh            | <sup>103</sup> Rh                  |
| Limit of detection of the measured ion(s) | 28 µg/L                        | Al: 32 µg/L<br>Ti: 1.1 µg/L        | 3.4 µg/L                  | 4.7 µg/L                     | 0.8 µg/L                     | Al: 5.7 µg/L<br>Si: 168 µg/L,      |
| Dilution factor for ICP-MS analysis       | x10                            | x4                                 | x200                      | x100                         | x2                           | x10                                |

It should be noted that the LOD for Zn in low-calcium Gamble's solution is high compared to the determined LOD of Zn in PSF. This is mainly due to Zn impurities in chemicals used for preparation of the low-calcium Gamble's solution. The concentration of dissolved Zn during 24 hours dissolution is approx. 200 times higher compared to LOD and is therefore not influenced by the relatively high LOD of Zn in low-calcium Gamble's solution.



## Size distributions

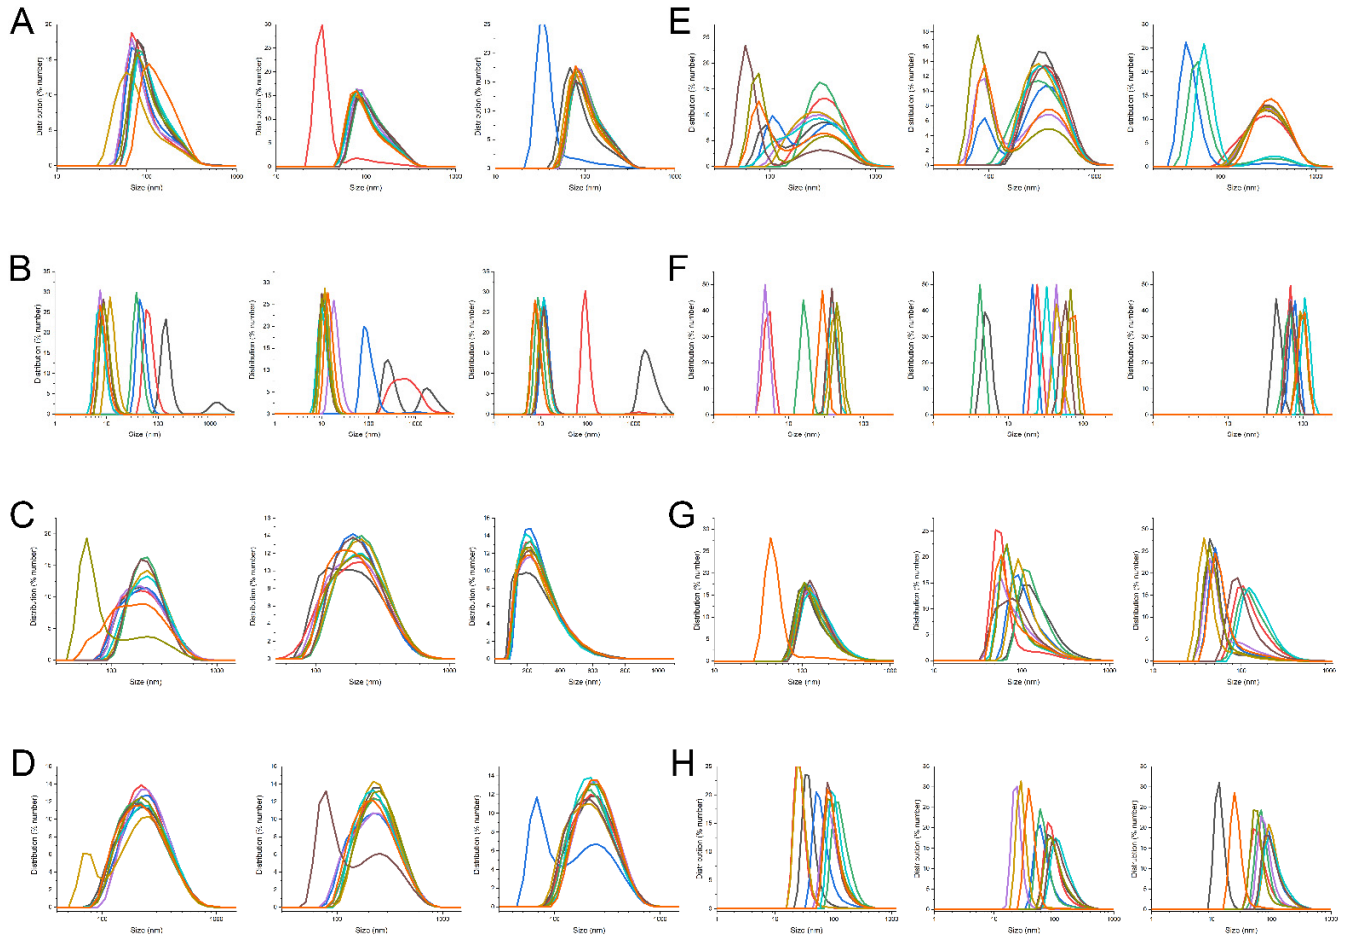

**Figure S3.** Size distributions (%number) of dispersions used for dissolution testing in low-calcium Gamble's solution (n=3). The size distributions show the ten repeated measurements. A) Al<sub>2</sub>O<sub>3</sub>, B) TiO<sub>2</sub> (NM-104), C) ZnO (NM-110), D) ZnO (NM-111), E) ZnO (NM-113), F) SiO<sub>2</sub> (NM-200), G) CeO<sub>2</sub> (NM-212), and H) bentonite (NM-600).

## Size distributions

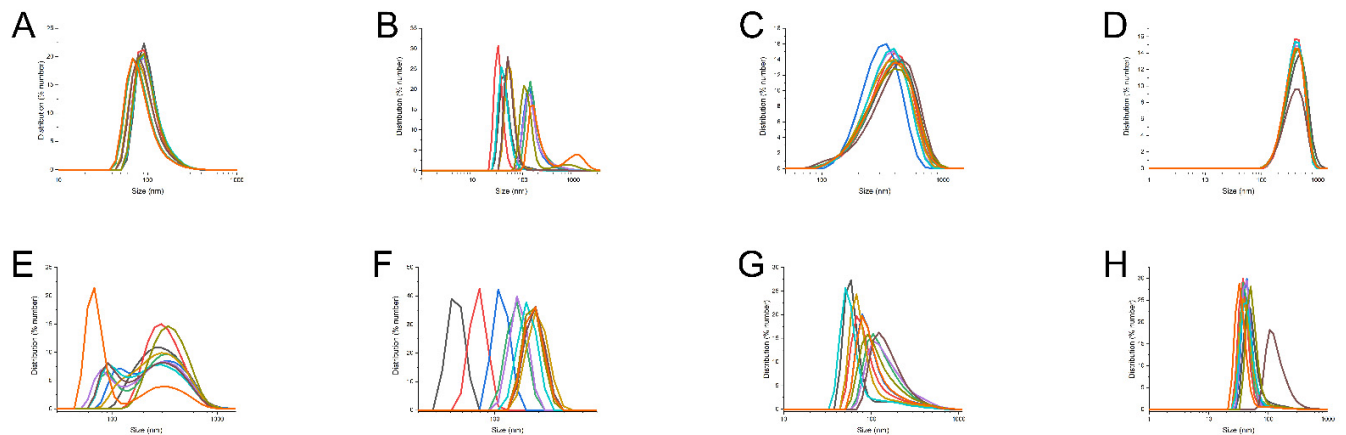

**Figure S4.** Size distributions (%number) of dispersions used for dissolution testing in phagolysosomal simulant fluid (n=3). The size distributions show the ten repeated measurements. A) Al<sub>2</sub>O<sub>3</sub>, B) TiO<sub>2</sub> (NM-104), C) ZnO (NM-110), D) ZnO (NM-111), E) ZnO (NM-113), F) SiO<sub>2</sub> (NM-200), G) CeO<sub>2</sub> (NM-212), and H) bentonite (NM-600).

## Reactivity in Gamble's solution

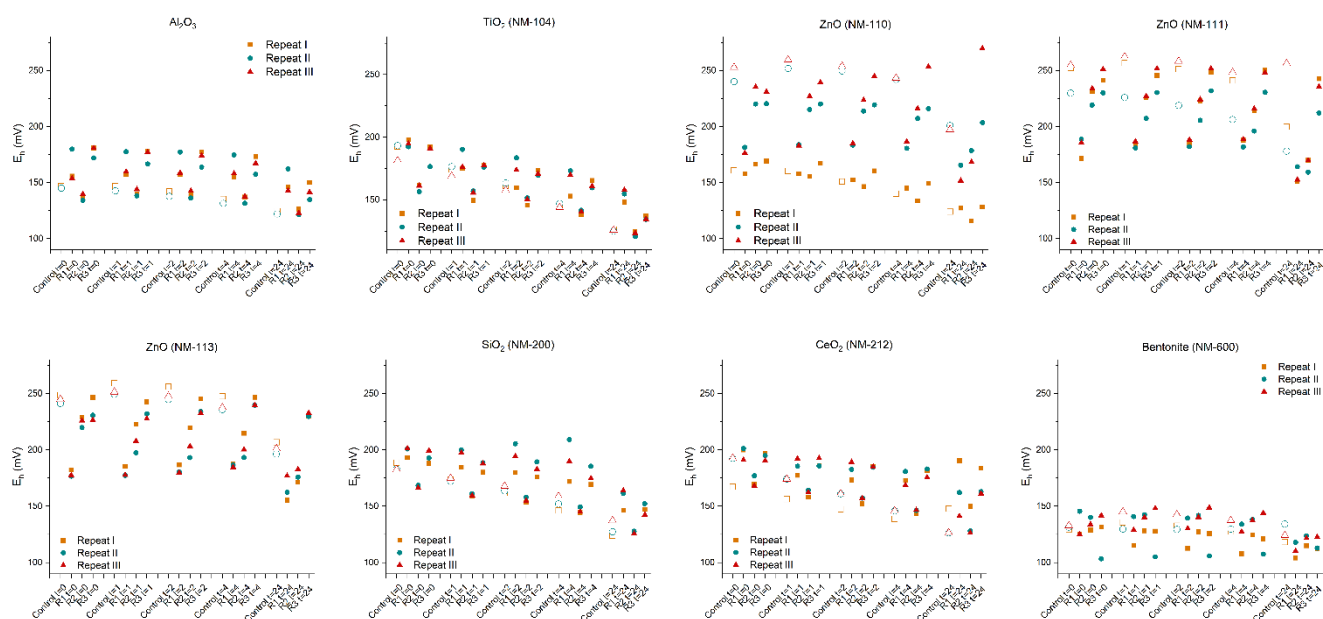

**Figure S5.** Reactivity of the test materials after testing in low-calcium Gamble's solution. Upper row:  $Al_2O_3$ ,  $TiO_2$  (NM-104),  $ZnO$  (NM-110), and  $ZnO$  (NM-111). Lower row:  $ZnO$  (NM-113),  $SiO_2$  (NM-200),  $CeO_2$  (NM-212), and bentonite (NM-600). The control reactors (I, II, and III) represent the redox potential in the pure medium over 24 hours. Test reactors (I, II, and III) indicated as repeat I, repeat II, and repeat III represent the three reactors during each dissolution test.

## Reactivity in phagolysosomal fluid

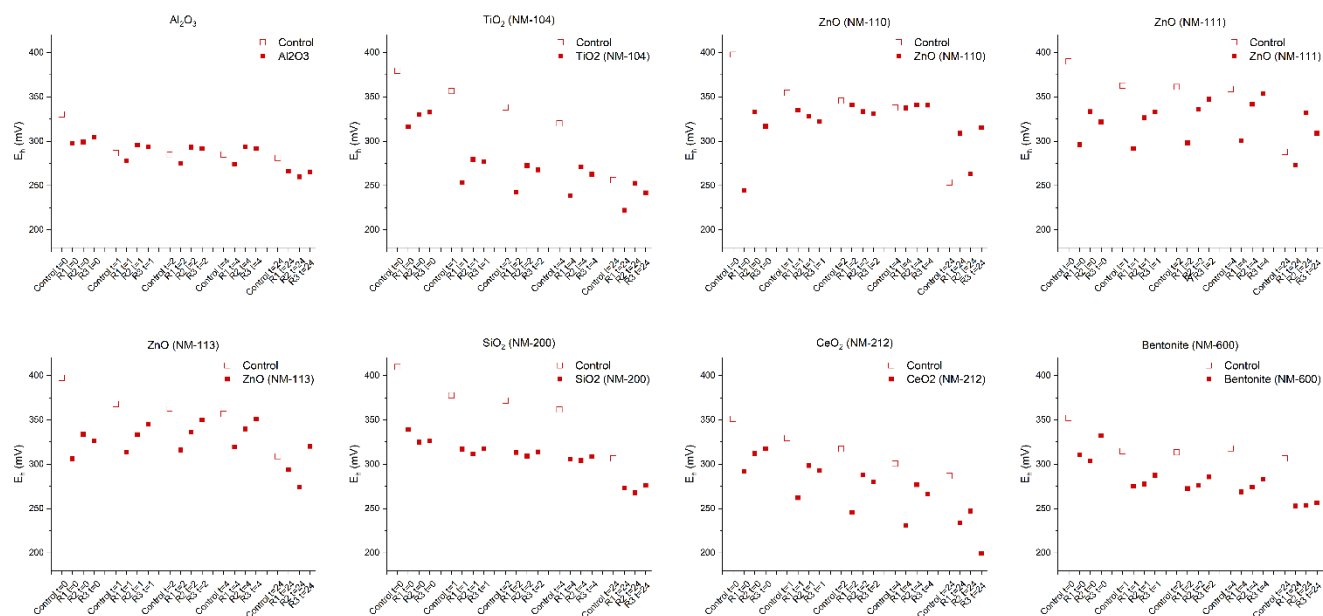

**Figure S6.** Reactivity of the test materials after testing in phagolysosomal fluid simulant. Upper row:  $Al_2O_3$ ,  $TiO_2$  (NM-104),  $ZnO$  (NM-110), and  $ZnO$  (NM-111). Lower row:  $ZnO$  (NM-113),  $SiO_2$  (NM-200),  $CeO_2$  (NM-212), and bentonite (NM-600). The control reactor (red square) represents the redox potential in the pure medium over 24 hours. Test reactors (R1, R2, and R3) indicated as R1, R2, and R3 represent the three reactors during each dissolution test.

**Table S3.** Measured redox potentials of Al<sub>2</sub>O<sub>3</sub>, TiO<sub>2</sub> (NM-104), ZnO (NM-110, NM-111, NM-113), SiO<sub>2</sub> (NM-200), CeO<sub>2</sub> (NM-212), and bentonite (NM-600) tested in low-calcium Gamble's solution in triplicate (I, II, III).

| Repeat I: Al <sub>2</sub> O <sub>3</sub> tested in Gamble's solution   |                |                  |                  |                  |              |              |
|------------------------------------------------------------------------|----------------|------------------|------------------|------------------|--------------|--------------|
| Time [h]                                                               | Replicate [mV] | Replicate 1 [mV] | Replicate 2 [mV] | Replicate 3 [mV] | Average [mV] | Std.dev [mV] |
| 0                                                                      | 146.9          | 155.9            | 135.9            | 181.0            | 157.6        | 22.6         |
| 1                                                                      | 147.0          | 157.3            | 140.1            | 178.4            | 158.6        | 19.2         |
| 2                                                                      | 142.1          | 157.2            | 139.3            | 177.3            | 157.9        | 19.0         |
| 4                                                                      | 135.4          | 155.3            | 137.2            | 173.3            | 155.3        | 18.1         |
| 24                                                                     | 124.7          | 146.2            | 126.4            | 150.2            | 140.9        | 12.7         |
| Repeat II: Al <sub>2</sub> O <sub>3</sub> tested in Gamble's solution  |                |                  |                  |                  |              |              |
| Time [h]                                                               | Replicate [mV] | Replicate 1 [mV] | Replicate 2 [mV] | Replicate 3 [mV] | Average [mV] | Std.dev [mV] |
| 0                                                                      | 145.1          | 179.9            | 134.3            | 172.0            | 162.1        | 24.3         |
| 1                                                                      | 142.7          | 177.7            | 138.3            | 166.7            | 160.9        | 20.3         |
| 2                                                                      | 137.8          | 177.3            | 136.3            | 163.9            | 159.2        | 20.9         |
| 4                                                                      | 131.5          | 174.8            | 131.6            | 157.4            | 154.6        | 21.7         |
| 24                                                                     | 122.1          | 162.4            | 121.5            | 134.9            | 139.6        | 20.9         |
| Repeat III: Al <sub>2</sub> O <sub>3</sub> tested in Gamble's solution |                |                  |                  |                  |              |              |
| Time [h]                                                               | Replicate [mV] | Replicate 1 [mV] | Replicate 2 [mV] | Replicate 3 [mV] | Average [mV] | Std.dev [mV] |
| 0                                                                      | 164.5          | 153.8            | 139.8            | 180.9            | 158.2        | 20.9         |
| 1                                                                      | 158.3          | 159.8            | 144.1            | 177.2            | 160.4        | 16.6         |
| 2                                                                      | 150.5          | 158.7            | 142.7            | 174.2            | 158.5        | 15.8         |
| 4                                                                      | 140.5          | 158.2            | 137.6            | 167.3            | 154.4        | 15.2         |
| 24                                                                     | 125.3          | 142.9            | 122.9            | 141.6            | 135.8        | 11.2         |
| Repeat I: TiO <sub>2</sub> (NM-104) tested in Gamble's solution        |                |                  |                  |                  |              |              |
| Time [h]                                                               | Replicate [mV] | Replicate 1 [mV] | Replicate 2 [mV] | Replicate 3 [mV] | Average [mV] | Std.dev [mV] |
| 0                                                                      | 192.6          | 197.8            | 161.6            | 192.4            | 183.9        | 19.5         |
| 1                                                                      | 174.2          | 175.0            | 149.6            | 177.7            | 167.4        | 15.5         |
| 2                                                                      | 161.1          | 159.8            | 145.7            | 173.6            | 159.7        | 14.0         |
| 4                                                                      | 145.9          | 152.9            | 138.0            | 165.5            | 152.1        | 13.8         |
| 24                                                                     | 126.4          | 148.1            | 124.8            | 137.3            | 136.7        | 11.7         |
| Repeat II: TiO <sub>2</sub> (NM-104) tested in Gamble's solution       |                |                  |                  |                  |              |              |
| Time [h]                                                               | Replicate [mV] | Replicate 1 [mV] | Replicate 2 [mV] | Replicate 3 [mV] | Average [mV] | Std.dev [mV] |
| 0                                                                      | 193.3          | 192.4            | 156.4            | 176.5            | 175.1        | 18.0         |
| 1                                                                      | 176.50         | 190.2            | 157.0            | 176.1            | 174.4        | 16.7         |
| 2                                                                      | 163.4          | 183.5            | 151.5            | 169.5            | 168.2        | 16.0         |
| 4                                                                      | 147.0          | 173.1            | 141.6            | 159.6            | 158.1        | 15.8         |
| 24                                                                     | 124.9          | 154.7            | 120.7            | 134.3            | 136.6        | 17.1         |
| Repeat III: TiO <sub>2</sub> (NM-104) tested in Gamble's solution      |                |                  |                  |                  |              |              |
| Time [h]                                                               | Replicate [mV] | Replicate 1 [mV] | Replicate 2 [mV] | Replicate 3 [mV] | Average [mV] | Std.dev [mV] |
| 0                                                                      | 181.3          | 194.7            | 161.2            | 191.0            | 182.3        | 18.4         |
| 1                                                                      | 168.9          | 176.2            | 155.6            | 177.5            | 169.8        | 12.3         |
| 2                                                                      | 157.6          | 173.8            | 150.3            | 170.8            | 165.0        | 12.8         |

| 4                                                    | 143.9          | 169.8            | 140.4            | 160.9            | 157.0        | 15.1         |
|------------------------------------------------------|----------------|------------------|------------------|------------------|--------------|--------------|
| 24                                                   | 125.8          | 157.9            | 123.4            | 134.6            | 138.6        | 17.6         |
| Repeat I: ZnO (NM-110) tested in Gamble's solution   |                |                  |                  |                  |              |              |
| Time [h]                                             | Replicate [mV] | Replicate 1 [mV] | Replicate 2 [mV] | Replicate 3 [mV] | Average [mV] | Std.dev [mV] |
| 0                                                    | 160.9          | 157.9            | 166.7            | 169.2            | 164.6        | 5.94         |
| 1                                                    | 160.4          | 157.8            | 155.6            | 167.2            | 160.2        | 6.16         |
| 2                                                    | 151.0          | 152.5            | 146.6            | 160.6            | 153.2        | 7.03         |
| 4                                                    | 140.2          | 145.1            | 134.0            | 149.5            | 142.9        | 7.99         |
| 24                                                   | 124.1          | 127.4            | 115.9            | 128.3            | 123.9        | 6.91         |
| Repeat II: ZnO (NM-110) tested in Gamble's solution  |                |                  |                  |                  |              |              |
| Time [h]                                             | Replicate [mV] | Replicate 1 [mV] | Replicate 2 [mV] | Replicate 3 [mV] | Average [mV] | Std.dev [mV] |
| 0                                                    | 240.1          | 181.4            | 220.2            | 220.6            | 207.4        | 22.5         |
| 1                                                    | 251.9          | 183.9            | 215.3            | 220.2            | 206.5        | 19.7         |
| 2                                                    | 249.7          | 183.4            | 213.9            | 219.4            | 205.6        | 19.4         |
| 4                                                    | 242.1          | 180.6            | 207.4            | 216.1            | 201.4        | 18.5         |
| 24                                                   | 201.0          | 165.6            | 178.6            | 203.6            | 182.6        | 19.3         |
| Repeat III: ZnO (NM-110) tested in Gamble's solution |                |                  |                  |                  |              |              |
| Time [h]                                             | Replicate [mV] | Replicate 1 [mV] | Replicate 2 [mV] | Replicate 3 [mV] | Average [mV] | Std.dev [mV] |
| 0                                                    | 252.9          | 176.4            | 235.4            | 231.1            | 214.3        | 32.9         |
| 1                                                    | 259.6          | 183.0            | 227.1            | 239.5            | 216.5        | 29.7         |
| 2                                                    | 253.9          | 185.1            | 223.7            | 245.0            | 217.9        | 30.4         |
| 4                                                    | 243.3          | 186.7            | 216.1            | 253.5            | 218.8        | 33.5         |
| 24                                                   | 197.3          | 151.8            | 168.4            | 269.8            | 196.7        | 63.9         |
| Repeat I: ZnO (NM-111) tested in Gamble's solution   |                |                  |                  |                  |              |              |
| Time [h]                                             | Replicate [mV] | Replicate 1 [mV] | Replicate 2 [mV] | Replicate 3 [mV] | Average [mV] | Std.dev [mV] |
| 0                                                    | 252.3          | 171.6            | 231.6            | 241.2            | 214.8        | 37.7         |
| 1                                                    | 256.7          | 183.1            | 225.8            | 245.7            | 218.2        | 32.0         |
| 2                                                    | 251.4          | 185.5            | 223.0            | 248.7            | 219.1        | 31.8         |
| 4                                                    | 241.3          | 187.9            | 214.3            | 250.3            | 217.5        | 31.3         |
| 24                                                   | 199.7          | 150.8            | 170.0            | 242.7            | 187.8        | 48.5         |
| Repeat II: ZnO (NM-111) tested in Gamble's solution  |                |                  |                  |                  |              |              |
| Time [h]                                             | Replicate [mV] | Replicate 1 [mV] | Replicate 2 [mV] | Replicate 3 [mV] | Average [mV] | Std.dev [mV] |
| 0                                                    | 229.9          | 188.7            | 219.2            | 230.2            | 212.7        | 21.5         |
| 1                                                    | 226.0          | 181.0            | 207.3            | 230.4            | 206.2        | 24.7         |
| 2                                                    | 218.9          | 182.1            | 205.6            | 232.0            | 206.6        | 25.0         |
| 4                                                    | 206.4          | 181.8            | 196.1            | 230.6            | 202.8        | 25.1         |
| 24                                                   | 178.1          | 164.2            | 159.3            | 212.3            | 178.6        | 29.3         |
| Repeat III: ZnO (NM-111) tested in Gamble's solution |                |                  |                  |                  |              |              |
| Time [h]                                             | Replicate [mV] | Replicate 1 [mV] | Replicate 2 [mV] | Replicate 3 [mV] | Average [mV] | Std.dev [mV] |
| 0                                                    | 254.7          | 185.5            | 234              | 251.3            | 223.6        | 34.1         |
| 1                                                    | 262.4          | 186.8            | 227.3            | 251.8            | 222.0        | 32.8         |
| 2                                                    | 258.4          | 188.3            | 224.2            | 251.8            | 221.4        | 31.8         |

| 4                                                                 | 248.3          | 188.8            | 216.0            | 248.1            | 217.6        | 29.7         |
|-------------------------------------------------------------------|----------------|------------------|------------------|------------------|--------------|--------------|
| 24                                                                | 256.3          | 152.6            | 169.8            | 235.7            | 186.0        | 43.9         |
| Repeat I: ZnO (NM-113) tested in Gamble's solution                |                |                  |                  |                  |              |              |
| Time [h]                                                          | Replicate [mV] | Replicate 1 [mV] | Replicate 2 [mV] | Replicate 3 [mV] | Average [mV] | Std.dev [mV] |
| 0                                                                 | 248.8          | 182.2            | 228.9            | 246.5            | 219.2        | 33.2         |
| 1                                                                 | 259.2          | 185.3            | 223.0            | 242.6            | 217.0        | 29.1         |
| 2                                                                 | 256.2          | 186.7            | 219.9            | 245.2            | 217.3        | 29.3         |
| 4                                                                 | 247.6          | 187.9            | 214.7            | 246.7            | 216.4        | 29.4         |
| 24                                                                | 206.8          | 155.5            | 171.4            | 230              | 185.6        | 39.2         |
| Repeat II: ZnO (NM-113) tested in Gamble's solution               |                |                  |                  |                  |              |              |
| Time [h]                                                          | Replicate [mV] | Replicate 1 [mV] | Replicate 2 [mV] | Replicate 3 [mV] | Average [mV] | Std.dev [mV] |
| 0                                                                 | 241.2          | 176.7            | 219.8            | 230.8            | 209.1        | 28.6         |
| 1                                                                 | 249.3          | 177.3            | 197.4            | 232.1            | 202.3        | 27.7         |
| 2                                                                 | 244.8          | 180.4            | 193.2            | 234.0            | 202.5        | 28.0         |
| 4                                                                 | 235.8          | 186.5            | 193.3            | 239.8            | 206.5        | 29.0         |
| 24                                                                | 196.3          | 162.4            | 175.9            | 229.7            | 189.3        | 35.6         |
| Repeat III: ZnO (NM-113) tested in Gamble's solution              |                |                  |                  |                  |              |              |
| Time [h]                                                          | Replicate [mV] | Replicate 1 [mV] | Replicate 2 [mV] | Replicate 3 [mV] | Average [mV] | Std.dev [mV] |
| 0                                                                 | 244.9          | 177.5            | 226              | 226.5            | 210.0        | 28.1         |
| 1                                                                 | 251.5          | 177.7            | 207.9            | 227.7            | 204.4        | 25.2         |
| 2                                                                 | 247.6          | 179.7            | 203.2            | 232.5            | 205.1        | 26.5         |
| 4                                                                 | 237.5          | 184.6            | 200.3            | 239.7            | 208.2        | 28.4         |
| 24                                                                | 201.1          | 177.0            | 182.8            | 232.8            | 197.5        | 30.7         |
| Repeat I: SiO <sub>2</sub> (NM-200) tested in Gamble's solution   |                |                  |                  |                  |              |              |
| Time [h]                                                          | Replicate [mV] | Replicate 1 [mV] | Replicate 2 [mV] | Replicate 3 [mV] | Average [mV] | Std.dev [mV] |
| 0                                                                 | 188.7          | 193.4            | 168.0            | 188.2            | 183.2        | 13.4         |
| 1                                                                 | 173.5          | 184.5            | 158.8            | 180.2            | 174.5        | 13.8         |
| 2                                                                 | 161.7          | 180.1            | 153.5            | 175.9            | 169.8        | 14.3         |
| 4                                                                 | 146.2          | 171.9            | 144.5            | 169.3            | 161.9        | 15.1         |
| 24                                                                | 124.1          | 146.6            | 126.4            | 147.2            | 140.1        | 11.8         |
| Repeat II: SiO <sub>2</sub> (NM-200) tested in Gamble's solution  |                |                  |                  |                  |              |              |
| Time [h]                                                          | Replicate [mV] | Replicate 1 [mV] | Replicate 2 [mV] | Replicate 3 [mV] | Average [mV] | Std.dev [mV] |
| 0                                                                 | 183.1          | 200.9            | 168.5            | 192.9            | 187.4        | 16.9         |
| 1                                                                 | 172.1          | 199.9            | 161.1            | 188.5            | 183.2        | 19.9         |
| 2                                                                 | 163.7          | 205.5            | 157.8            | 189.4            | 184.2        | 24.3         |
| 4                                                                 | 152.0          | 209.1            | 149.3            | 185.5            | 181.3        | 30.1         |
| 24                                                                | 127.4          | 161.5            | 127.8            | 152.3            | 147.2        | 17.4         |
| Repeat III: SiO <sub>2</sub> (NM-200) tested in Gamble's solution |                |                  |                  |                  |              |              |
| Time [h]                                                          | Replicate [mV] | Replicate 1 [mV] | Replicate 2 [mV] | Replicate 3 [mV] | Average [mV] | Std.dev [mV] |
| 0                                                                 | 182.4          | 201.4            | 166.3            | 199.4            | 189.0        | 19.7         |
| 1                                                                 | 174.8          | 197.5            | 159.5            | 187.9            | 181.6        | 19.8         |
| 2                                                                 | 167.9          | 194.4            | 154.8            | 182.9            | 177.4        | 20.4         |



| 4                                                                 | 158.9          | 189.8            | 145.0            | 174.7            | 169.8        | 22.8         |
|-------------------------------------------------------------------|----------------|------------------|------------------|------------------|--------------|--------------|
| 24                                                                | 137.3          | 163.9            | 125.6            | 142.4            | 144.0        | 19.2         |
| Repeat I: CeO <sub>2</sub> (NM-212) tested in Gamble's solution   |                |                  |                  |                  |              |              |
| Time [h]                                                          | Replicate [mV] | Replicate 1 [mV] | Replicate 2 [mV] | Replicate 3 [mV] | Average [mV] | Std.dev [mV] |
| 0                                                                 | 167.3          | 200.0            | 169.4            | 196.8            | 188.7        | 16.8         |
| 1                                                                 | 156.2          | 177.4            | 158.2            | 186.1            | 173.9        | 14.3         |
| 2                                                                 | 147.4          | 173.4            | 152.2            | 185.6            | 170.4        | 16.9         |
| 4                                                                 | 138.8          | 173.1            | 143.3            | 181.5            | 166.0        | 20.1         |
| 24                                                                | 147.9          | 190.4            | 150.0            | 184.0            | 174.8        | 21.7         |
| Repeat II: CeO <sub>2</sub> (NM-212) tested in Gamble's solution  |                |                  |                  |                  |              |              |
| Time [h]                                                          | Replicate [mV] | Replicate 1 [mV] | Replicate 2 [mV] | Replicate 3 [mV] | Average [mV] | Std.dev [mV] |
| 0                                                                 | 192.6          | 201.2            | 177.1            | 194.9            | 191.1        | 12.5         |
| 1                                                                 | 174.2          | 185.5            | 164.1            | 185.9            | 178.5        | 12.5         |
| 2                                                                 | 161.1          | 182.7            | 157.2            | 184.6            | 174.8        | 15.3         |
| 4                                                                 | 145.9          | 180.9            | 146.3            | 183.1            | 170.1        | 20.6         |
| 24                                                                | 126.4          | 162.3            | 128.0            | 162.9            | 151.1        | 20.0         |
| Repeat III: CeO <sub>2</sub> (NM-212) tested in Gamble's solution |                |                  |                  |                  |              |              |
| Time [h]                                                          | Replicate [mV] | Replicate 1 [mV] | Replicate 2 [mV] | Replicate 3 [mV] | Average [mV] | Std.dev [mV] |
| 0                                                                 | 192.6          | 191.1            | 168.1            | 190.4            | 183.2        | 13.1         |
| 1                                                                 | 174.2          | 192.3            | 162.3            | 192.6            | 182.4        | 17.4         |
| 2                                                                 | 161.1          | 189.3            | 157.1            | 185.1            | 177.2        | 17.5         |
| 4                                                                 | 145.9          | 168.8            | 146.6            | 175.6            | 163.7        | 15.2         |
| 24                                                                | 126.4          | 141.2            | 126.3            | 161.2            | 142.9        | 17.5         |
| Repeat I: Bentonite (NM-600) tested in Gamble's solution          |                |                  |                  |                  |              |              |
| Time [h]                                                          | Replicate [mV] | Replicate 1 [mV] | Replicate 2 [mV] | Replicate 3 [mV] | Average [mV] | Std.dev [mV] |
| 0                                                                 | 129.6          | 125.2            | 128.9            | 131.5            | 128.5        | 3.17         |
| 1                                                                 | 135.7          | 115.1            | 128.2            | 127.9            | 123.7        | 7.48         |
| 2                                                                 | 132.8          | 112.6            | 127.3            | 125.8            | 121.9        | 8.09         |
| 4                                                                 | 127.6          | 107.9            | 124.8            | 121.1            | 117.9        | 8.88         |
| 24                                                                | 118.3          | 104.1            | 115.0            | 112.0            | 110.4        | 5.63         |
| Repeat II: Bentonite (NM-600) tested in Gamble's solution         |                |                  |                  |                  |              |              |
| Time [h]                                                          | Replicate [mV] | Replicate 1 [mV] | Replicate 2 [mV] | Replicate 3 [mV] | Average [mV] | Std.dev [mV] |
| 0                                                                 | 131.5          | 145.6            | 140.1            | 103.4            | 129.7        | 22.9         |
| 1                                                                 | 129.8          | 140.9            | 142.5            | 105.1            | 129.5        | 21.1         |
| 2                                                                 | 129.4          | 139.5            | 141.8            | 105.9            | 129.1        | 20.1         |
| 4                                                                 | 129.7          | 134.1            | 138.3            | 107.5            | 126.6        | 16.7         |
| 24                                                                | 134.2          | 117.9            | 123.6            | 112.9            | 118.1        | 5.35         |
| Repeat III: Bentonite (NM-600) tested in Gamble's solution        |                |                  |                  |                  |              |              |
| Time [h]                                                          | Replicate [mV] | Replicate 1 [mV] | Replicate 2 [mV] | Replicate 3 [mV] | Average [mV] | Std.dev [mV] |
| 0                                                                 | 132.8          | 125.1            | 133.9            | 141.8            | 133.6        | 8.35         |
| 1                                                                 | 145.1          | 129.0            | 140.1            | 148.2            | 139.1        | 9.64         |
| 2                                                                 | 142.6          | 130.2            | 140.3            | 148.7            | 139.7        | 9.26         |

|    |       |       |       |       |       |      |
|----|-------|-------|-------|-------|-------|------|
| 4  | 137.4 | 127.4 | 137.4 | 144.0 | 136.3 | 8.36 |
| 24 | 124.2 | 110.3 | 121.6 | 122.7 | 118.2 | 6.86 |

**Table S4.** Measured redox potentials of Al<sub>2</sub>O<sub>3</sub>, TiO<sub>2</sub> (NM-104), ZnO (NM-110, NM-111, NM-113), SiO<sub>2</sub> (NM-200), CeO<sub>2</sub> (NM-212), and bentonite (NM-600) tested in phagolysosomal simulant fluid.

| Al <sub>2</sub> O <sub>3</sub> tested in phagolysosomal simulant fluid |                |                  |                  |                  |              |              |
|------------------------------------------------------------------------|----------------|------------------|------------------|------------------|--------------|--------------|
| Time [h]                                                               | Replicate [mV] | Replicate 1 [mV] | Replicate 2 [mV] | Replicate 3 [mV] | Average [mV] | Std.dev [mV] |
| 0                                                                      | 330.3          | 297.6            | 299.0            | 304.7            | 300.4        | 3.76         |
| 1                                                                      | 286.6          | 277.8            | 295.6            | 293.6            | 289.0        | 9.75         |
| 2                                                                      | 284.7          | 274.7            | 293.3            | 291.6            | 286.5        | 10.3         |
| 4                                                                      | 285.0          | 274.2            | 293.5            | 292.0            | 286.6        | 10.7         |
| 24                                                                     | 281.3          | 265.9            | 259.8            | 265.4            | 263.7        | 3.39         |
| TiO <sub>2</sub> (NM-104) tested in phagolysosomal simulant fluid      |                |                  |                  |                  |              |              |
| Time [h]                                                               | Replicate [mV] | Replicate 1 [mV] | Replicate 2 [mV] | Replicate 3 [mV] | Average [mV] | Std.dev [mV] |
| 0                                                                      | 379.6          | 316.1            | 330.2            | 332.7            | 326.3        | 8.95         |
| 1                                                                      | 356.6          | 253.1            | 279.4            | 277.1            | 269.9        | 14.6         |
| 2                                                                      | 338.2          | 242.7            | 272.5            | 267.8            | 261.0        | 16.0         |
| 4                                                                      | 320.1          | 238.4            | 271.1            | 262.6            | 257.4        | 17.0         |
| 24                                                                     | 256.1          | 222.1            | 252.7            | 241.9            | 238.9        | 15.5         |
| ZnO (NM-110) tested in phagolysosomal simulant fluid                   |                |                  |                  |                  |              |              |
| Time [h]                                                               | Replicate [mV] | Replicate 1 [mV] | Replicate 2 [mV] | Replicate 3 [mV] | Average [mV] | Std.dev [mV] |
| 0                                                                      | 397.6          | 244.4            | 333.2            | 316.8            | 298.1        | 47.3         |
| 1                                                                      | 354.5          | 335.2            | 328.0            | 322.2            | 328.5        | 6.51         |
| 2                                                                      | 345.7          | 341.0            | 333.4            | 331.2            | 335.2        | 5.14         |
| 4                                                                      | 337.7          | 337.5            | 340.7            | 340.6            | 339.6        | 1.82         |
| 24                                                                     | 253.4          | 309.0            | 263.4            | 315.3            | 295.9        | 28.3         |
| ZnO (NM-111) tested in phagolysosomal simulant fluid                   |                |                  |                  |                  |              |              |
| Time [h]                                                               | Replicate [mV] | Replicate 1 [mV] | Replicate 2 [mV] | Replicate 3 [mV] | Average [mV] | Std.dev [mV] |
| 0                                                                      | 389.8          | 296.0            | 333.4            | 321.8            | 317.1        | 19.1         |
| 1                                                                      | 362.70         | 291.8            | 326.5            | 333.1            | 317.1        | 22.2         |
| 2                                                                      | 361.2          | 298.3            | 336.2            | 347.4            | 327.3        | 25.7         |
| 4                                                                      | 358.8          | 300.4            | 341.6            | 353.6            | 331.9        | 27.9         |
| 24                                                                     | 288.0          | 272.7            | 332.3*           | 308.9            | 193.9        | 30.0         |
| ZnO (NM-113) tested in phagolysosomal simulant fluid                   |                |                  |                  |                  |              |              |
| Time [h]                                                               | Replicate [mV] | Replicate 1 [mV] | Replicate 2 [mV] | Replicate 3 [mV] | Average [mV] | Std.dev [mV] |
| 0                                                                      | 397.4          | 306.1            | 333.7            | 326.5            | 322.1        | 14.3         |
| 1                                                                      | 368.1          | 313.5            | 333.6            | 345.4            | 330.8        | 16.1         |
| 2                                                                      | 363.2          | 316.0            | 336.3            | 349.7            | 334.0        | 17.0         |
| 4                                                                      | 356.6          | 319.3            | 339.8            | 350.9            | 336.7        | 16.0         |
| 24                                                                     | 309.1          | 293.8            | 274.0            | 320.1            | 296.0        | 23.1         |
| SiO <sub>2</sub> (NM-200) tested in phagolysosomal simulant fluid      |                |                  |                  |                  |              |              |
| Time [h]                                                               | Replicate [mV] | Replicate 1 [mV] | Replicate 2 [mV] | Replicate 3 [mV] | Average [mV] | Std.dev [mV] |

| Time [h] | Replicate [mV] | Replicate 1 [mV] | Replicate 2 [mV] | Replicate 3 [mV] | Average [mV] | Std.dev [mV] |
|----------|----------------|------------------|------------------|------------------|--------------|--------------|
| 0        | 409.6          | 339.0            | 324.9            | 326.1            | 330.0        | 7.82         |
| 1        | 377.6          | 317.0            | 311.6            | 317.2            | 315.3        | 3.18         |
| 2        | 372.0          | 313.2            | 309.1            | 313.9            | 312.1        | 2.59         |
| 4        | 361.7          | 305.9            | 304.2            | 308.7            | 306.3        | 2.27         |
| 24       | 306.5          | 273.1            | 267.9            | 276.4            | 272.5        | 4.29         |

  

| CeO <sub>2</sub> (NM-212) tested in phagolysosomal simulant fluid |                |                  |                  |                  |              |              |
|-------------------------------------------------------------------|----------------|------------------|------------------|------------------|--------------|--------------|
| Time [h]                                                          | Replicate [mV] | Replicate 1 [mV] | Replicate 2 [mV] | Replicate 3 [mV] | Average [mV] | Std.dev [mV] |
| 0                                                                 | 351.2          | 291.7            | 312.0            | 317.6            | 307.1        | 13.6         |
| 1                                                                 | 329.5          | 262.1            | 298.4            | 293.1            | 284.5        | 19.6         |
| 2                                                                 | 317.1          | 245.7            | 287.8            | 280.0            | 271.2        | 22.4         |
| 4                                                                 | 300.7          | 231.0            | 276.8            | 266.1            | 258.0        | 24.0         |
| 24                                                                | 286.7          | 234.1            | 247.2            | 199.1            | 226.8        | 24.9         |

  

| Bentonite (NM-600) tested in phagolysosomal simulant fluid |                |                  |                  |                  |              |              |
|------------------------------------------------------------|----------------|------------------|------------------|------------------|--------------|--------------|
| Time [h]                                                   | Replicate [mV] | Replicate 1 [mV] | Replicate 2 [mV] | Replicate 3 [mV] | Average [mV] | Std.dev [mV] |
| 0                                                          | 352.2          | 310.6            | 303.6            | 332.5            | 315.6        | 15.1         |
| 1                                                          | 314.7          | 275.3            | 277.6            | 287.4            | 280.1        | 6.43         |
| 2                                                          | 313.5          | 272.5            | 276.4            | 285.6            | 278.2        | 6.73         |
| 4                                                          | 317.9          | 268.8            | 274.2            | 283.1            | 275.4        | 7.22         |
| 24                                                         | 306.3          | 252.9            | 253.4            | 256.4            | 254.2        | 1.89         |

**Table S5.** *p*-values after Student's t-test to evaluate potentially reactivity of the NMs in low-calcium Gamble's solution. Significant values are highlighted in bold.

| Al <sub>2</sub> O <sub>3</sub> tested in low-calcium Gamble's solution |               |               |               |
|------------------------------------------------------------------------|---------------|---------------|---------------|
| Time [h]                                                               | Replicate 1   | Replicate 2   | Replicate 3   |
| 0                                                                      | 0.1421        | <b>0.046</b>  | 0.3221        |
| 1                                                                      | 0.0686        | <b>0.0142</b> | 0.6717        |
| 2                                                                      | <b>0.0205</b> | <b>0.0077</b> | 0.1143        |
| 4                                                                      | <b>0.0052</b> | <b>0.0062</b> | <b>0.0132</b> |
| 24                                                                     | <b>0.0022</b> | <b>0.0197</b> | <b>0.0114</b> |

  

| TiO <sub>2</sub> (NM-104) tested in low-calcium Gamble's solution |             |                |               |
|-------------------------------------------------------------------|-------------|----------------|---------------|
| Time [h]                                                          | Replicate 1 | Replicate 1    | Replicate 3   |
| 0                                                                 | 0.1575      | <b>0.0082</b>  | 0.7535        |
| 1                                                                 | 0.1677      | 0.6721         | 0.8201        |
| 2                                                                 | 0.7144      | 0.3356         | 0.0831        |
| 4                                                                 | 0.1560      | <b>0.0407</b>  | <b>0.0167</b> |
| 24                                                                | 0.0154      | <b>0.04582</b> | <b>0.0350</b> |

  

| ZnO (NM-110) tested in low-calcium Gamble's solution |               |               |               |
|------------------------------------------------------|---------------|---------------|---------------|
| Time [h]                                             | Replicate 1   | Replicate 1   | Replicate 3   |
| 0                                                    | <b>0.0170</b> | <b>0.0005</b> | <b>0.0027</b> |
| 1                                                    | 0.9184        | <0.0001       | <b>0.0010</b> |
| 2                                                    | 0.2909        | <0.0001       | <b>0.0035</b> |

|                                                                   |             |             |             |
|-------------------------------------------------------------------|-------------|-------------|-------------|
| 4                                                                 | 0.2736      | <0.0001     | 0.0347      |
| 24                                                                | 0.9227      | 0.0109      | 0.9734      |
| ZnO (NM-111) tested in low-calcium Gamble's solution              |             |             |             |
| Time [h]                                                          | Replicate 1 | Replicate 1 | Replicate 3 |
| 0                                                                 | 0.0080      | 0.0235      | 0.0128      |
| 1                                                                 | 0.0031      | 0.0240      | 0.0027      |
| 2                                                                 | 0.0077      | 0.1275      | 0.0038      |
| 4                                                                 | 0.0300      | 0.6384      | 0.0072      |
| 24                                                                | 0.4211      | 0.9543      | 0.0969      |
| ZnO (NM-113) tested in low-calcium Gamble's solution              |             |             |             |
| Time [h]                                                          | Replicate 1 | Replicate 1 | Replicate 3 |
| 0                                                                 | 0.0125      | 0.0039      | 0.0018      |
| 1                                                                 | 0.0010      | 0.0004      | 0.0002      |
| 2                                                                 | 0.0017      | 0.0008      | 0.0005      |
| 4                                                                 | 0.0065      | 0.0081      | 0.0072      |
| 24                                                                | 0.0986      | 0.5179      | 0.7137      |
| SiO <sub>2</sub> (NM-200) tested in low-calcium Gamble's solution |             |             |             |
| Time [h]                                                          | Replicate 1 | Replicate 1 | Replicate 3 |
| 0                                                                 | 0.1919      | 0.4229      | 0.2827      |
| 1                                                                 | 0.8139      | 0.0910      | 0.2645      |
| 2                                                                 | 0.0827      | 0.0194      | 0.1479      |
| 4                                                                 | 0.0071      | 0.0097      | 0.1364      |
| 24                                                                | 0.0016      | 0.0044      | 0.2634      |
| CeO <sub>2</sub> (NM-212) tested in low-calcium Gamble's solution |             |             |             |
| Time [h]                                                          | Replicate 1 | Replicate 1 | Replicate 3 |
| 0                                                                 | 0.0023      | 0.8094      | 0.5391      |
| 1                                                                 | 0.0026      | 0.3134      | 0.1033      |
| 2                                                                 | 0.0015      | 0.0230      | 0.0203      |
| 4                                                                 | 0.0016      | 0.0052      | 0.0094      |
| 24                                                                | 0.0026      | 0.0028      | 0.0114      |
| Bentonite (NM-600) tested in low-calcium Gamble's solution        |             |             |             |
| Time [h]                                                          | Replicate 1 | Replicate 1 | Replicate 3 |
| 0                                                                 | 0.2535      | 0.7928      | 0.7790      |
| 1                                                                 | 0.0006      | 0.9564      | 0.0643      |
| 2                                                                 | 0.0016      | 0.9614      | 0.3177      |
| 4                                                                 | 0.0054      | 0.5425      | 0.6516      |
| 24                                                                | 0.0012      | <0.0001     | 0.0161      |

**Table S6.** *p* -values after Student's t-test to evaluate potentially reactivity of the NMs in phagolysosomal simulant fluid. Significant values are highlighted in bold.

| Time | Al <sub>2</sub> O <sub>3</sub> | TiO <sub>2</sub> | ZnO | ZnO | ZnO | SiO <sub>2</sub> | CeO <sub>2</sub> | Bentonite |
|------|--------------------------------|------------------|-----|-----|-----|------------------|------------------|-----------|
|------|--------------------------------|------------------|-----|-----|-----|------------------|------------------|-----------|

|    |         | (NM-104) | (NM-110) | (NM-111) | (NM-113) | (NM-200) | (NM-212) | (NM-600) |
|----|---------|----------|----------|----------|----------|----------|----------|----------|
| 0  | <0.0001 | <0.0001  | <0.0001  | <0.0001  | <0.0001  | <0.0001  | <0.0001  | <0.0001  |
| 1  | 0.4187  | <0.0001  | <0.0001  | <0.0001  | <0.0001  | <0.0001  | <0.0001  | <0.0001  |
| 2  | 0.5540  | <0.0001  | <0.0001  | 0.002    | <0.0001  | <0.0001  | <0.0001  | <0.0001  |
| 4  | 0.6268  | <0.0001  | 0.0062   | 0.0102   | 0.002579 | <0.0001  | <0.0001  | <0.0001  |
| 24 | <0.0001 | 0.0050   | 0.0008   | 0.7460*  | 0.0847   | <0.0001  | <0.0001  | <0.0001  |

\*An electrode in a reactor containing ZnO (NM-111) stopped measuring after 13 hours. The point t<sub>24</sub> was therefore removed.

**Table S7.** dE<sub>h</sub> values in low-calcium Gamble's solution and phagolysosomal simulant fluid.

| Time                           | Test medium                   |            | dE <sub>h</sub> min [mV] | dE <sub>h</sub> max [mV] | Difference [mV] |
|--------------------------------|-------------------------------|------------|--------------------------|--------------------------|-----------------|
| Al <sub>2</sub> O <sub>3</sub> | Low-calcium Gamble's solution | Repeat I   | -12.24                   | 11.51                    | 23.75           |
|                                |                               | Repeat II  | -9.11                    | 7.01                     | 16.12           |
|                                |                               | Repeat III | -7.38                    | 21.18                    | 28.56           |
|                                | Phagolysosomal simulant fluid |            | -0.58                    | 32.11                    | 32.69           |
| TiO <sub>2</sub> (NM-104)      | Low-calcium Gamble's solution | Repeat I   | -9.61                    | 19.67                    | 29.28           |
|                                |                               | Repeat II  | -0.57                    | 32.48                    | 33.05           |
|                                |                               | Repeat III | -9.03                    | 13.44                    | 22.47           |
|                                | Phagolysosomal simulant fluid |            | -33.97                   | 42.93                    | 76.9            |
| ZnO (NM-110)                   | Low-calcium Gamble's solution | Repeat I   | -4.06                    | 22.62                    | 26.68           |
|                                |                               | Repeat II  | -48.09                   | -18.09                   | 30.00           |
|                                |                               | Repeat III | -50.24                   | -0.62                    | 49.62           |
|                                | Phagolysosomal simulant fluid |            | -4.06                    | 22.62                    | 26.68           |
| ZnO (NM-111)                   | Low-calcium Gamble's solution | Repeat I   | 0.06                     | 145.74                   | 145.80          |
|                                |                               | Repeat II  | -47.14                   | -6.88                    | 40.26           |
|                                |                               | Repeat III | -35.18                   | 5.47                     | 40.65           |
|                                | Phagolysosomal simulant fluid |            | -47.54                   | -16.83                   | 30.71           |
| ZnO (NM-113)                   | Low-calcium Gamble's solution | Repeat I   | -43.66                   | -15.39                   | 28.27           |
|                                |                               | Repeat II  | -49.21                   | -6.60                    | 42.61           |
|                                |                               | Repeat III | -48.22                   | -3.17                    | 45.05           |
|                                | Phagolysosomal simulant fluid |            | -0.91                    | 62.94                    | 63.85           |
| SiO <sub>2</sub> (NM-200)      | Low-calcium Gamble's solution | Repeat I   | -11.88                   | 26.78                    | 38.66           |
|                                |                               | Repeat II  | -10.62                   | 29.16                    | 39.78           |
|                                |                               | Repeat III | -9.21                    | 4.24                     | 13.45           |
|                                | Phagolysosomal simulant fluid |            | -2.03                    | 51.69                    | 53.72           |
| CeO <sub>2</sub> (NM-212)      | Low-calcium Gamble's solution | Repeat I   | -20.07                   | 10.11                    | 30.18           |
|                                |                               | Repeat II  | -11.66                   | 29.21                    | 40.87           |
|                                |                               | Repeat III | -10.58                   | 15.72                    | 26.30           |
|                                | Phagolysosomal simulant fluid |            | -21.38                   | 4.46                     | 25.84           |
| Bentonite (NM-600)             | Low-calcium Gamble's solution | Repeat I   | -11.28                   | -0.01                    | 11.29           |
|                                |                               | Repeat II  | -14.20                   | 2.38                     | 16.58           |
|                                |                               | Repeat III | -8.31                    | -0.49                    | 8.80            |

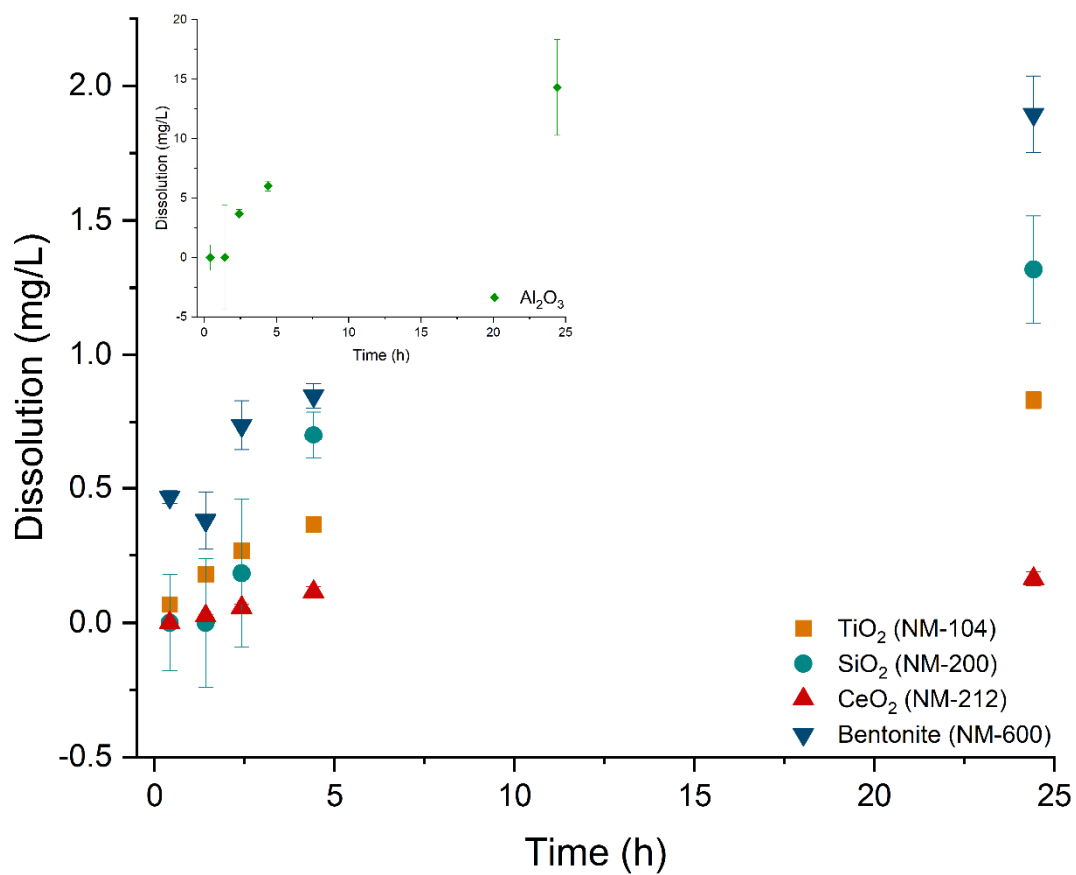

**Figure S7.** Depiction of dissolution in phagolysosomal simulant fluid. ZnO (NM-110, NM-111, and NM-113) is not depicted as the dissolution occurred within 25 min. Al<sub>2</sub>O<sub>3</sub> (◆), TiO<sub>2</sub> (NM-104) (■), SiO<sub>2</sub> (NM-200) (●), CeO<sub>2</sub> (NM-212) (▲), and bentonite (NM-600) (▼).
